# Supplementary material for: Strain-inversion Strategy Achieving 53μm-ultra-thick, Stress-free III-nitride Heteroepitaxy by MOCVD
Source: Research Square preprint supplement (doi:10.21203/rs.3.rs-7912578/v1), 2025-11-06
Supplement: Supplementary file 1 [file 273a3f35d658dd176d29a289.docx]

Supporting Information

Strain-inversion Strategy Achieving 53μm-ultra-thick, Stress-free III-nitride Heteroepitaxy by MOCVD

Junkang Wu1, Xuelin Yang1,2,*, Faquan Wu1, Xingyu Fu1, Hongcai Yang1, Zhenghao Chen1, Lin Yao1, Beile Chen1, Han Yang1, Yingming Song1, Yuxia Feng4, Fujun Xu1, Ning Tang1,2, Xinqiang Wang1,2,3, Weikun Ge1, and Bo Shen1,2,3,*

1State Key Laboratory of Artificial Microstructure and Mesoscopic Physics, Nano-optoelectronics Frontier Center of Ministry of Education, School of Physics, Peking University, Beijing, China

2Peking University Yangtze Delta Institute of Optoelectronics, Nantong, Jiangsu, China

3Collaborative Innovation Center of Quantum Matter, Beijing, China

4The Key Laboratory of Optoelectronics Technology, Ministry of Education, Beijing University of Technology, Beijing, China

E-mail: xlyang@pku.edu.cn, bshen@pku.edu.cn

Detailed derivation process and expression of the strain-inversion strategy: we treat the 4H-SiC/AlN compliant layer and the GaN epilayer as two elastically coupled plates (**Fig. S1**). 1-3 For biaxial strain in the plane of the interface, the system must obey: 4, 5

(1) force balance on every plane parallel to the interface:

(2) kinematic compatibility (total in-plane strain):

Solving **Eq.(S1)** and **Eq.(S2)** gives the strain partition effect in **Eq. (1)**.

The total strain *εm* is composed of thermal mismatch strain *εCTE* and lattice mismatch strain *εlattice*. The lattice mismatch strain relaxes with the increasing of the film thickness *tf* through the generation of misfit dislocations: 6

The thermal mismatch strain is fixed by the thermal expansion coefficient of substrate layer *αs* and film *αf*, as well as the growth temperature *Tgrowth* and room temperature *Troom*:

The lattice mismatch strain depends on the in-plane lattice constants of the substrate *as* and film *af*:

The relaxing rate of the lattice mismatch strain follows: 7, 8

By combining the **Eq. (S3) ~ (S6)**, we establish the relationship between the total strain and the films thickness. This comprehensive analysis enables the determination of partitioned strain in the substrate layer and film.


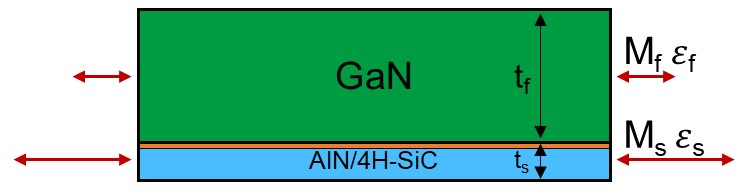


**Fig. S1** Schematic diagram of the strain-inversion strategy system. A thin AlN/4H-SiC substrate stack (thickness *ts*, biaxial modulus *Ms*) is elastically coupled to the GaN epilayer (*tf*, *Mf*). The total strain *εm* is partitioned so that the substrate stack accommodates most of the deformation (*εs*), leaving the GaN film nearly strain-free (*εf*).

X-ray reciprocal-space mapping demonstrates complete coherence between the AlN nucleation layer and the underlying 4H-SiC substrate across all measured thicknesses (1~10 µm). The GaN epilayer remain essentially stress-free, as corroborated by subsequent Raman measurements. The corresponding in-plane reciprocal-lattice vector (Qx) shifts for AlN and 4H-SiC are extracted and plotted in **Fig. 2(b)**.


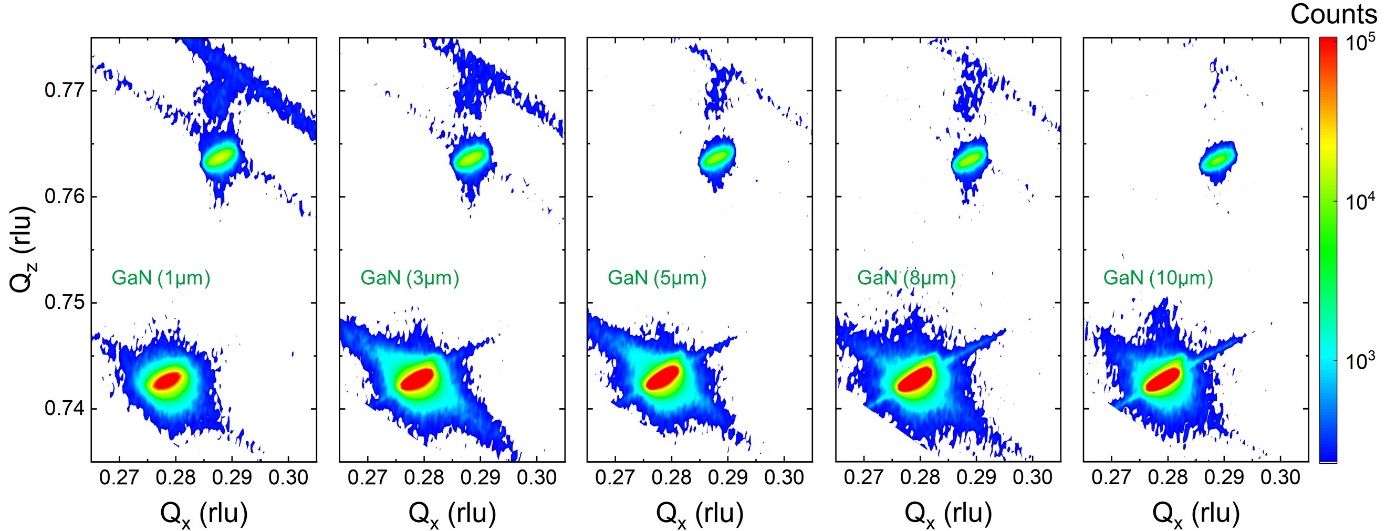


**Fig. S2** (-1015) RSM of GaN films with thicknesses of 1~10 µm.

The polycrystalline ceramic-AlN (bottom) exhibits a characteristic grain-stack morphology, whereas the overlying single-crystal GaN forms a continuous, uniform layer. Sharp, defect-free interfaces and the absence of cracks across the entire imaged area corroborate effective stress management within the strain-inversion strategy.


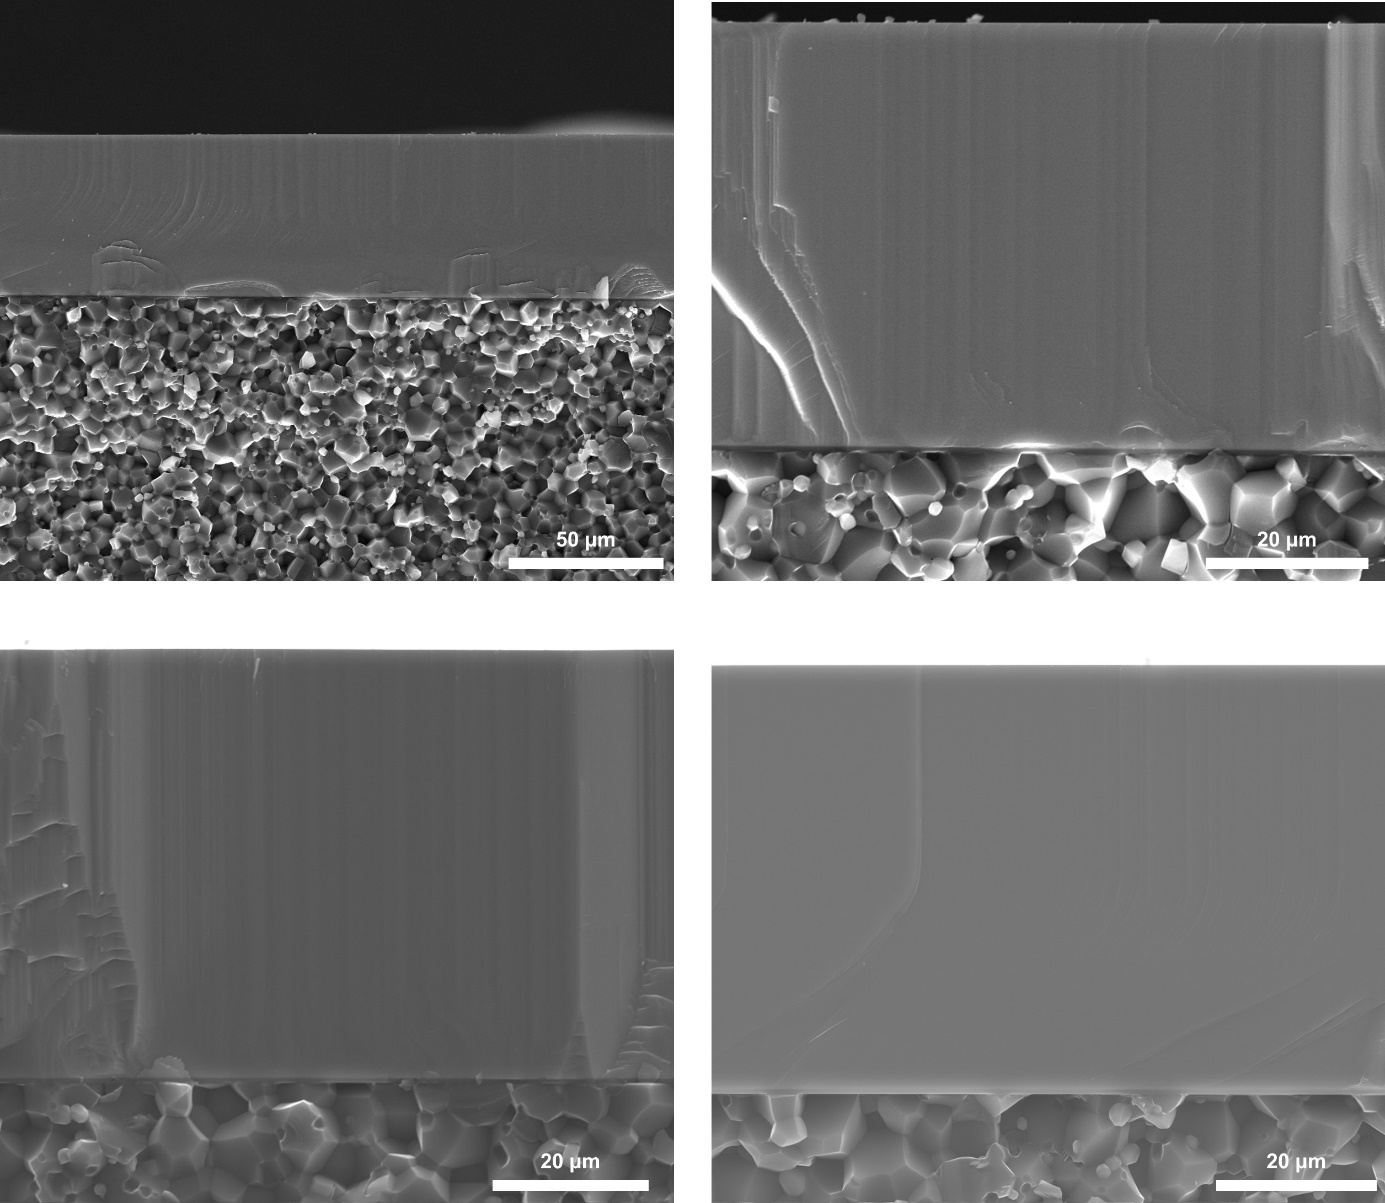


**Fig. S3** Additional cross-sectional SEM images of the 53 μm GaN film.

Real-time in-situ reflectance during the growth of the 53 µm sample. It gives the growth sequence that the 53 µm GaN was grown directly after the 50 nm AlN nucleation layer. Without any strain-control buffer, the average amplitude turned out to be a constant, leading to the conclusion of steady surface morphology during the whole growth procedure.


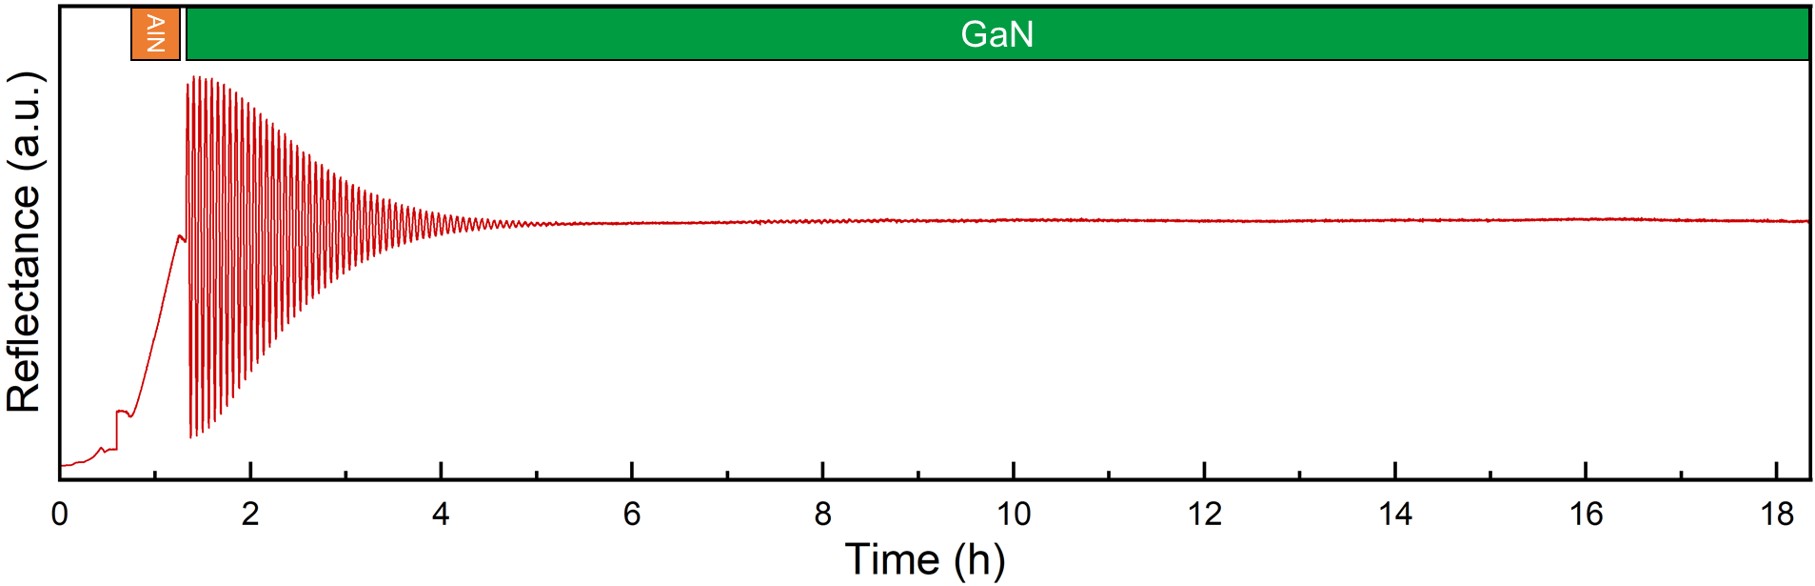


**Fig. S4** In-situ reflectance monitoring during the growth of the 53 µm GaN film. The consistent average amplitude indicates stable surface morphology throughout the entire deposition process.

References

1. Jiang Q, Liu C, Lu Y, Chen KJ. 1.4-kV AlGaN/GaN HEMTs on a GaN-on-SOI Platform. *IEEE Electron Device Letters* **34**, 357-359 (2013).

2. Cao J, Pavlidis D, Park Y, Singh J, Eisenbach A. Improved quality GaN by growth on compliant silicon-on-insulator substrates using metalorganic chemical vapor deposition. *J Appl Phys* **83**, 3829-3834 (1998).

3. Vohra A*, et al.* Epitaxial buffer structures grown on 200 mm engineering substrates for 1200 V E-mode HEMT application. *Appl Phys Lett* **120**, (2022).

4. Freund LB, Nix WD. A critical thickness condition for a strained compliant substrate/epitaxial film system. *Appl Phys Lett* **69**, 173-175 (1996).

5. Li MD*, et al.* An extended Stoney's formula including nonlinear deformation for large size wafer of multilayers with arbitrary thicknesses. *Scripta Materialia* **186**, 29-32 (2020).

6. Barghout K, Chaudhuri J. Calculation of residual thermal stress in GaN epitaxial layers grown on technologically important substrates. *Journal of Materials Science* **39**, 5817-5823 (2004).

7. Lim YS, Lee JY, Kim TW. The strain relaxation in a lattice-mismatched heterostructure. *J Cryst Growth* **200**, 421-426 (1999).

8. Dunstan DJ*, et al.* Plastic relaxation of metamorphic single layer and multilayer InGaAs/GaAs structures. *Appl Phys Lett* **65**, 839-841 (1994).
